# Supplementary material
Source: PubMed Central journal article supplement (PMC3292255)
Supplement: NIHMS328346-supplement-1.pdf [file NIHMS328346-supplement-1.pdf]

ONLINE SUPPLEMENT

Supplementary Tables

S 1. Definition of Risk-Adjustment Variables Used in Statistical Models

### **S1. Definition of Risk-Adjustment Variables Used in Statistical Models**

| <b>Risk-Adjustment Variable</b>                          | <b>HCC Code</b>             |
|----------------------------------------------------------|-----------------------------|
| History of heart failure                                 | HCC 80                      |
| History of acute myocardial infarction                   | HCC 81                      |
| Unstable angina                                          | HCC 82                      |
| Chronic atherosclerosis                                  | HCC 83-84                   |
| Cardiopulmonary-respiratory failure and shock            | HCC 79                      |
| Hypertension                                             | HCC 89, 91                  |
| Cerebrovascular disease                                  | HCC 97-99, 103              |
| Renal failure                                            | HCC 131                     |
| Chronic obstructive pulmonary disease                    | HCC 108                     |
| Pneumonia                                                | HCC 111-113                 |
| Diabetes                                                 | HCC 15-20, 120              |
| Protein-calorie malnutrition                             | HCC 21                      |
| Dementia                                                 | HCC 49-50                   |
| Hemiplegia, paraplegia, paralysis, functional disability | HCC 100-102, 68-69, 177-178 |
| Peripheral vascular disease                              | HCC 104-105                 |
| Metastatic cancer                                        | HCC 7-8                     |
| Trauma in last year                                      | HCC 154-156, 158-162        |
| Major psychiatric disorders                              | HCC 54-56                   |
| Chronic liver disease                                    | HCC 25-27                   |
| Severe hematological                                     | HCC 44                      |
| Depression                                               | HCC 58                      |
| Parkinson's or Huntington's disease                      | HCC 73                      |
| Anemia                                                   | HCC 47                      |
| Seizure disorder                                         | HCC 74                      |
| Asthma                                                   | HCC 110                     |
| Chronic fibrosis                                         | HCC 109                     |
| Vertebral fractures                                      | HCC 157                     |

Abbreviations: HCC = hierarchical condition categories
